# Supplementary material for: Mechanistic studies of the copolymerization between ethyl diazoacetate and cinnamaldehyde
Source: Royal Society of Chemistry journal article supplement (doi:10.1039/c6py02126c), 2017-01-01
Supplement: c6py02126c1.pdf [file c6py02126c1.pdf]

***Mechanistic studies of the copolymerization  
between ethyl diazoacetate and cinnamaldehyde***

*Yan Li, Cheng Chen, Feifei Li, Liqiong Liao, Lijian Liu\**

Key Laboratory of Biomedical Polymers, Ministry of Education, College of Chemistry  
and Molecular Sciences, Wuhan University, Wuhan, 430072, China

**Electronic Supplementary Information**

# Contents

|                                                                         |    |
|-------------------------------------------------------------------------|----|
| 1. Supplementary Materials and Methods .....                            | 2  |
| 2. Supplementary Results and Discussion .....                           | 3  |
| 2.1 FT-IR spectroscopy .....                                            | 3  |
| 2.2 XRD curve .....                                                     | 4  |
| 2.3 Thermal properties .....                                            | 5  |
| 2.4 Mechanism studies of the block coupling by inhibition of TEMPO..... | 7  |
| 2.5 Mechanism studies of the block coupling by EPR.....                 | 8  |
| 2.6 IR kinetics .....                                                   | 11 |
| 2.7 DFT calculations for diradicals .....                               | 12 |
| 2.8 DFT calculations for Step 1 .....                                   | 21 |
| 3. Supplementary Reference: .....                                       | 24 |

## 1. Supplementary Materials and Methods

**Cell imaging.** Human cervix carcinoma (HeLa) cells were incubated in a complete medium (Dulbecco's modified Eagle's medium (DMEM) supplemented with 10% fetal bovine serum (FBS)) with 5% CO<sub>2</sub> at 37 °C. The cells were seeded in a NEST confocal dish at a density of  $1 \times 10^5$  cells and cultured in 2 mL of complete medium for 24 h. Then, a solution of copolymer (100 µg) dissolved in 20 µL of DMSO was added, followed by further incubation for another 4 h at 37 °C. Imaging examination under UV-Vis excitation (458 nm) was conducted with a Zeiss Axiovert 200 fluorescence microscope. The two-photon-excitation fluorescence imaging experiment was performed using a Zeiss LSM 510 META NLO confocal microscope over the range of 720-950 nm.

## 2. Supplementary Results and Discussion

### 2.1 FT-IR spectroscopy

The FT-IR spectrum of the copolymer of EDA with CA (**Fig. S1**) shows that the bending vibration of  $-CHO$  is located at approximately  $2,850\text{ cm}^{-1}$ . The intense bands at approximately  $1,700\text{ cm}^{-1}$  belong to the carbonyl and aldehyde groups. The peak at approximately  $1,550\text{ cm}^{-1}$  can be assigned to the azo group derived from EDA.<sup>1</sup>

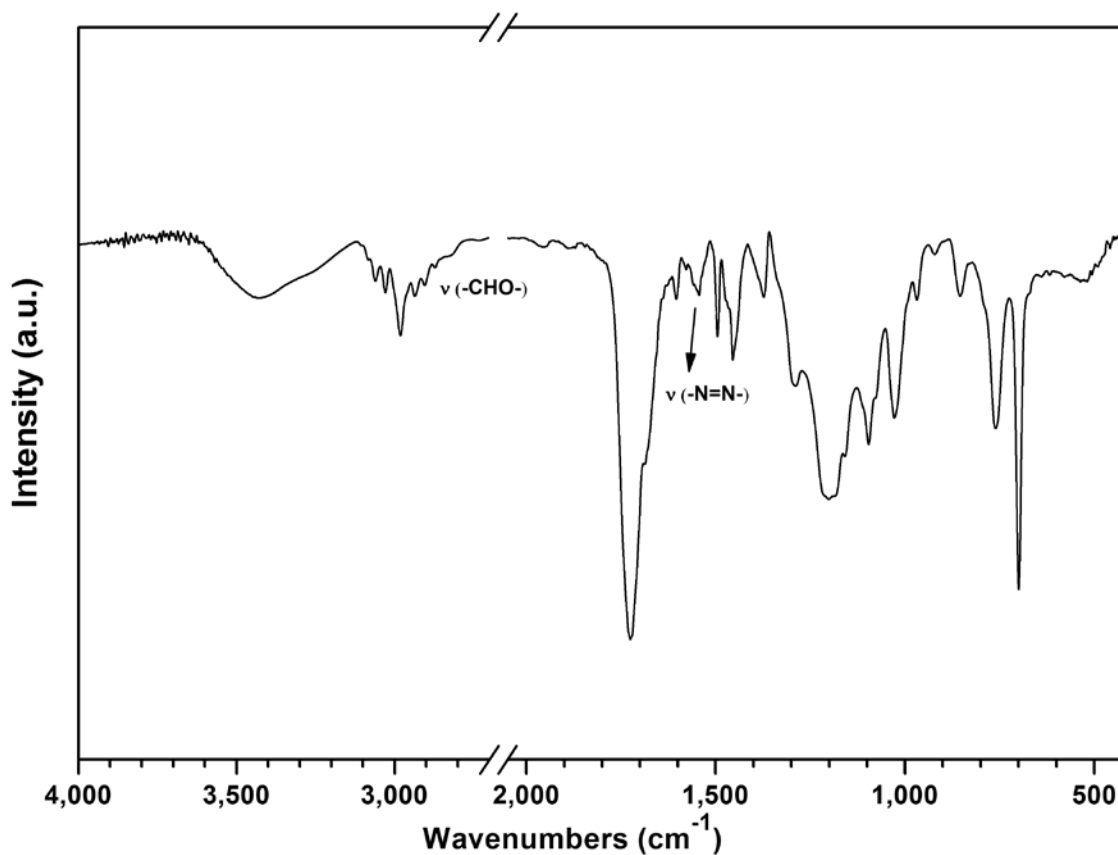

**Fig. S1.** FT-IR spectrum of the copolymer of EDA with CA.

## 2.2 XRD curve

XRD curve (**Fig. S2**) reveals that the copolymer is random.

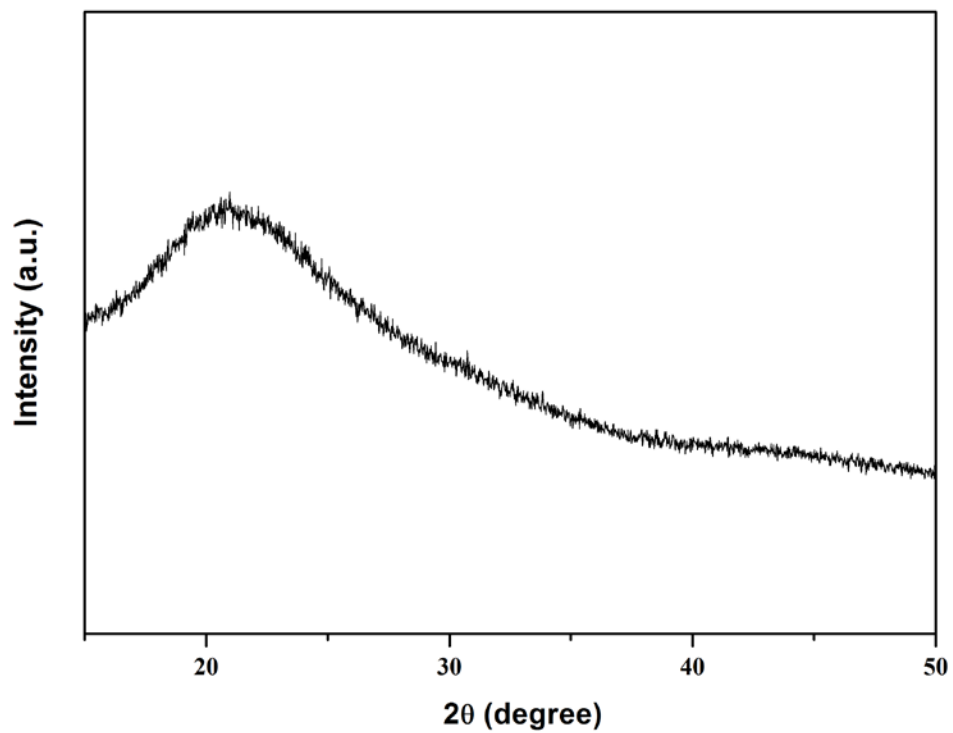

**Fig. S2.** XRD curve of the copolymer of EDA with CA.

## 2.3 Thermal properties

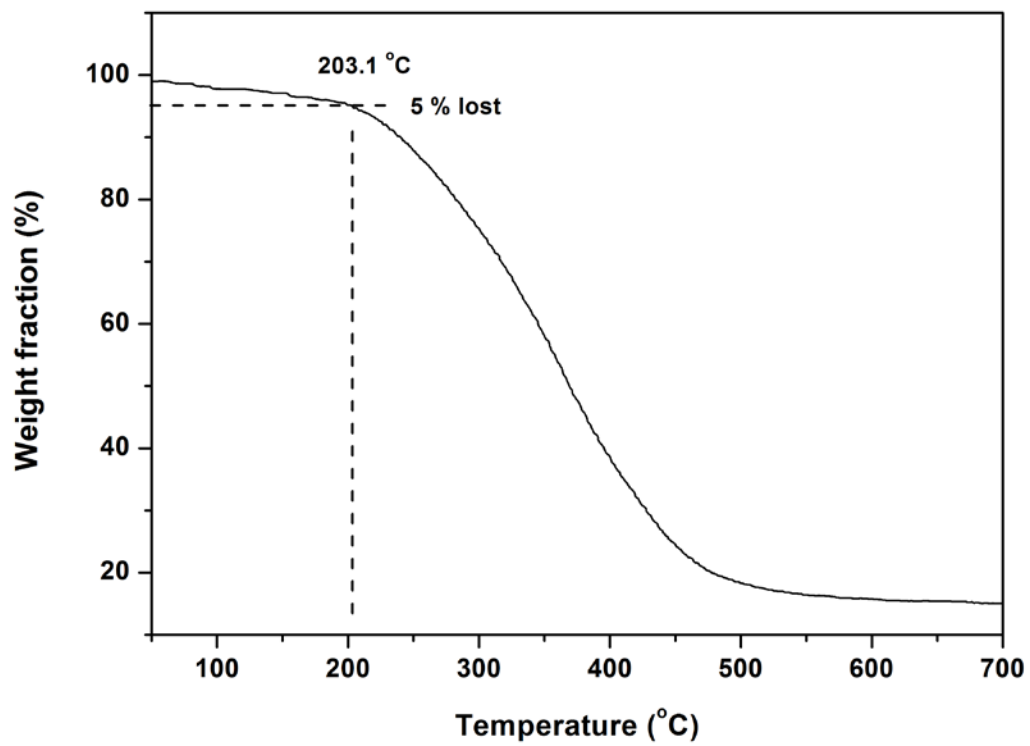

**Fig. S3. TGA curve of the copolymer of EDA with CA.**

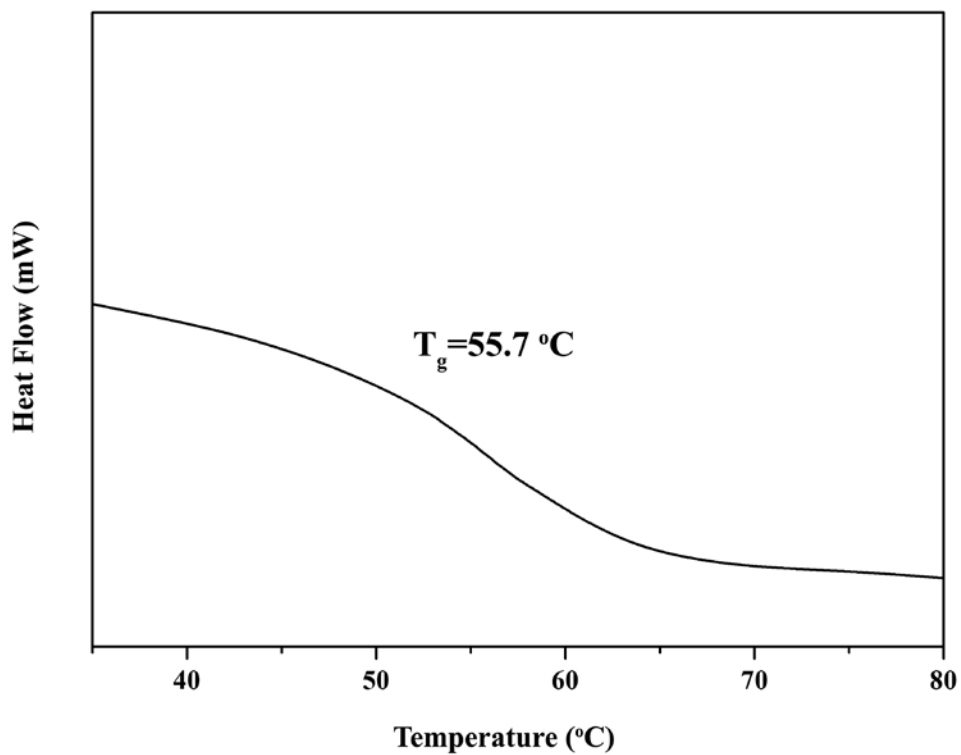

**Fig. S4. DSC curve of the copolymer of EDA with CA.** These data are recorded in the 2nd round. T<sub>g</sub> means glass transition temperature.

**Fig. S3** is the TGA curve of the copolymer of EDA with CA, which shows that the obtained copolymer is thermostable, losing merely 5% of their weights at 203.1 °C (T<sub>L</sub>). **Fig. S4** is the DSC curve of the copolymer, and the T<sub>g</sub> is 55.7 °C.

## 2.4 Mechanism studies of the block coupling by inhibition of TEMPO

EDA and CA can be restrained by the addition of radical inhibitor 2,2,6,6-tetramethylpiperidine-1-oxyl (TEMPO), for which the peaks around 1.3 ppm and 4.2 ppm without TEMPO are broadened obviously compared to those with TEMPO, suggesting the polymerization of monomers by the change of chemical environment with the formation of main chain. In conclusion, the reaction is a possible radical mechanism. <sup>2</sup> (Fig. S5)

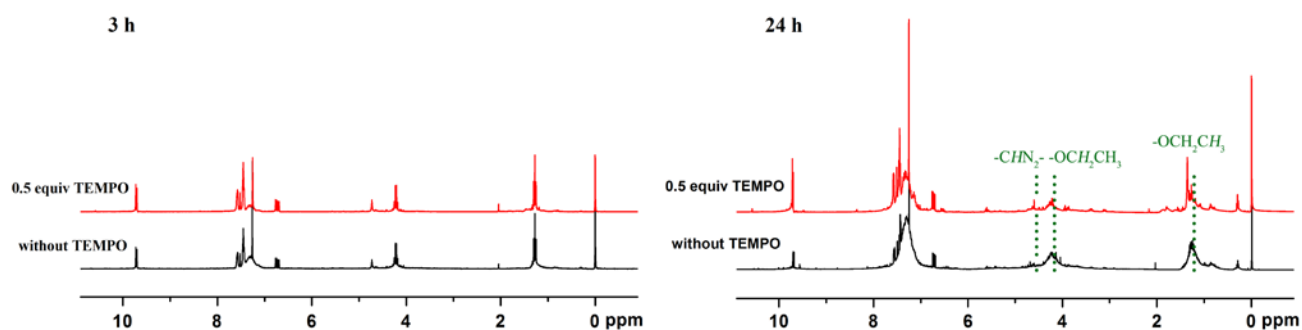

**Fig. S5. TEMPO inhibition effects on the copolymerization.** Conditions: CA (5.0 mmol, 1.0 equiv) and EDA (5.0 mmol, 1.0 equiv) are mixed at 60 °C under blowing nitrogen.



## 2.5 Mechanism studies of the block coupling by EPR

By RT-EPR spectroscopy, spin-trapping experiments using N-tert-butyl- $\alpha$ -phenylnitone (PBN) as spin trap was tried (**Fig. S6**), which shows triplet radical signals and confirms the existence of the radicals. Through addition of DMPO into EDA or CA separately, no signal was detected in EPR spectrum (**Fig. S7** or **Fig. S8**).

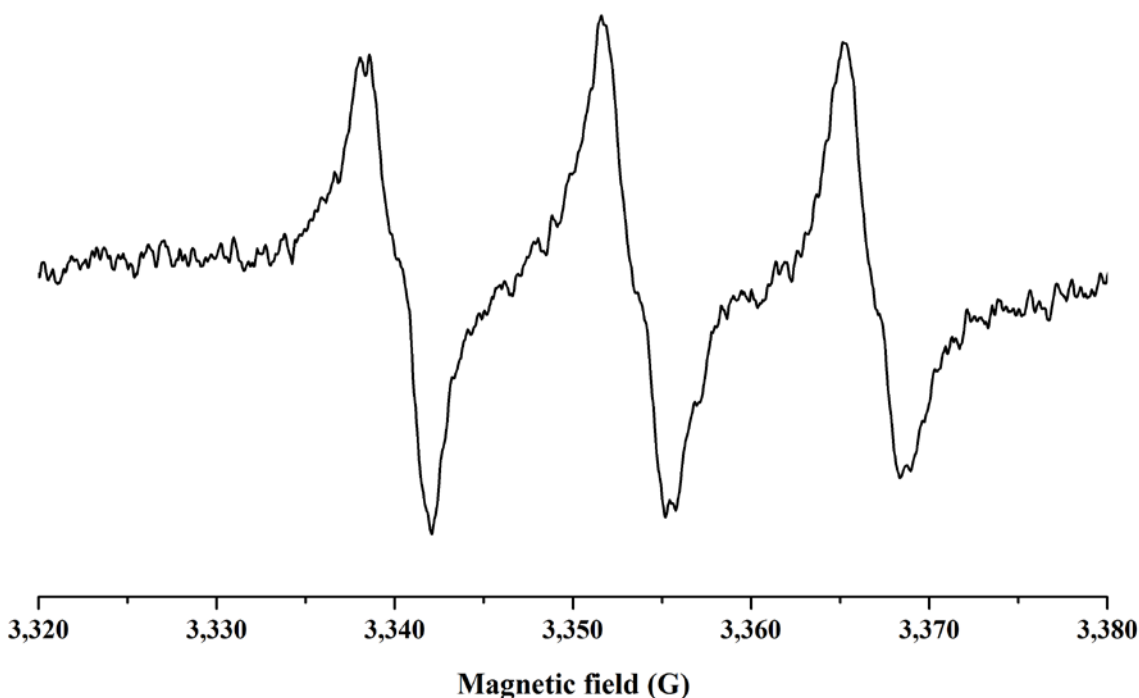

**Fig. S6.** EPR measurement of the reaction mixture of EDA and CA trapped by PBN. Conditions: cinnamaldehyde (5.0 mmol, 0.66 g) and EDA (5.0 mmol, 0.57 g) in 5 ml toluene at 60.0 °C with stream of dry nitrogen.

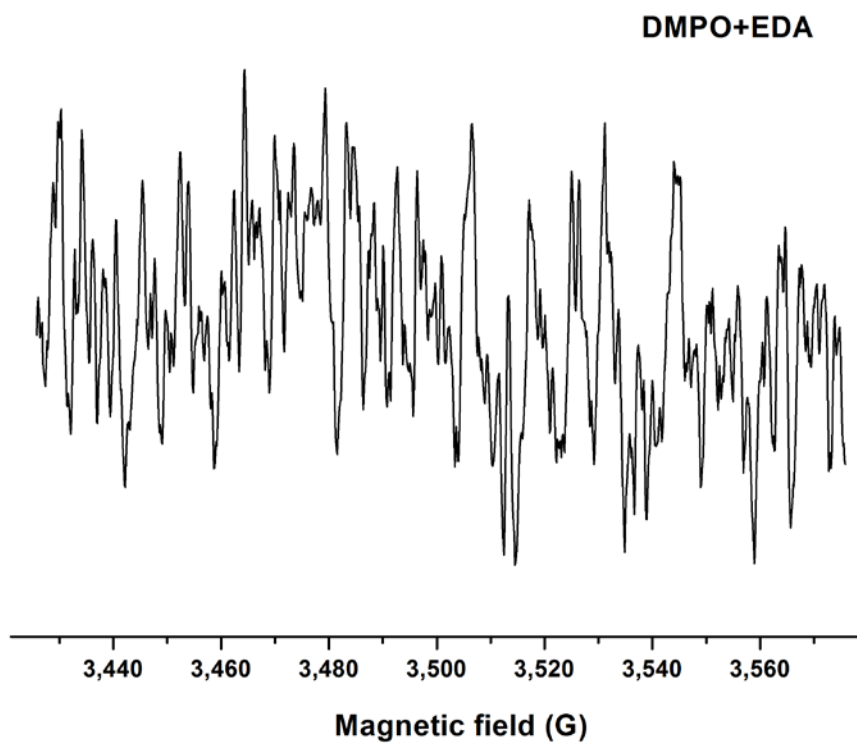

**Fig. S7. EPR measurement of EDA trapped by DMPO.**

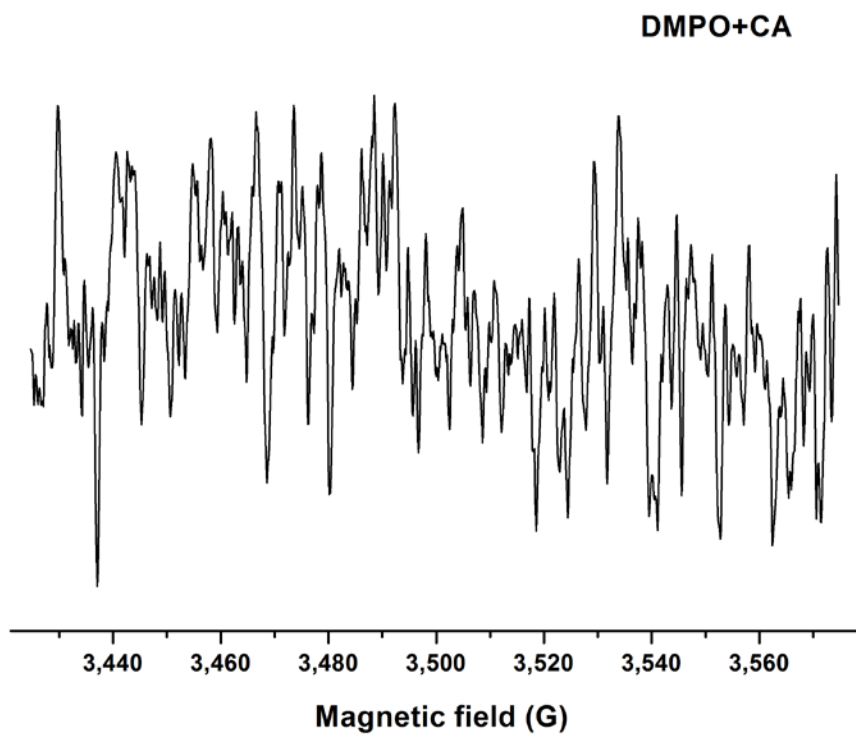

**Fig. S8. EPR measurement of CA trapped by DMPO.**

## 2.6 IR kinetics

Fig. S9 plots the relationship between peak area of the product and the reaction time in 480 minutes. From the curve, it can be observed that the peak area of -N=N- group keeps increasing but follows with a sudden drop periodically, which may be the complicated behaviours of azo-participated reactions, or a result of instrument/probe error and something not inherent to the reaction. Thus, we are discussing the kinetics behaviour in initial 119.5 minutes in the main text.

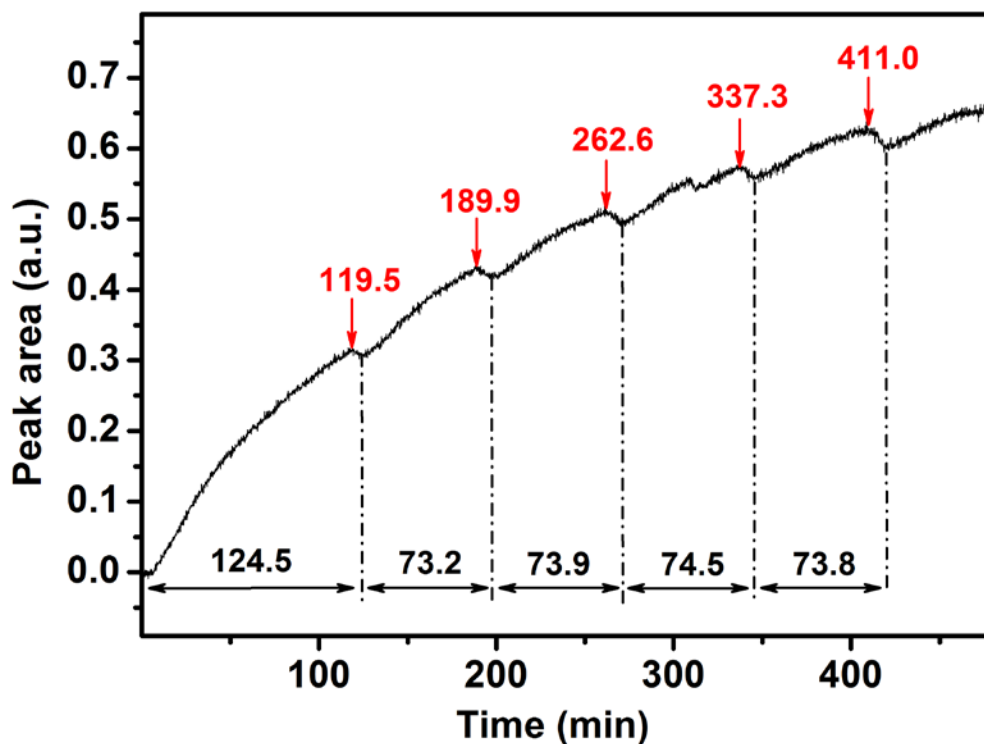

Fig. S9. The plot between the peak area from 1528 to 1565  $\text{cm}^{-1}$  and the reaction time in 480 minutes.

## 2.7 DFT calculations for diradicals

EDA  $N^{\text{diazo}}$ ,  $C^3$ -diradical, EDA-CA  $N^{\text{diazo}}$ ,  $C^5$ -diradical and EDA-EDA-CA  $N^{\text{diazo}}$ ,  $C^8$ -diradical are calculated by DFT using M06-2X/def2-SVP, and the details are shown in Table S1-4.

Two possible diradical structures of  $N^{\text{diazo}}$ ,  $C^5$ -diradical ( $N^{\text{diazo}}$ ,  $C^5$ -diradical 1 and  $N^{\text{diazo}}$ ,  $C^5$ -diradical 2) were proposed and the results revealed that electrons are distributed on N atom and C atom, respectively.

The total energy of  $N^{\text{diazo}}$ ,  $C^5$ -diradical 1 is -837.90391759 a.u., while that of  $N^{\text{diazo}}$ ,  $C^5$ -diradical 2 is -837.90059171 a.u.. The energy difference between the two structures is calculated as below.

$$-837.90391759 - (-837.90059171) * 627.51 \text{ kcal/mol} \approx -2.09 \text{ kcal/mol} ,$$

which means that the energy of  $N^{\text{diazo}}$ ,  $C^5$ -diradical 1 is 2.09 kcal/mol lower than that of  $N^{\text{diazo}}$ ,  $C^5$ -diradical 2. So  $N^{\text{diazo}}$ ,  $C^5$ -diradical 1 is more stable and acts as the practical  $N^{\text{diazo}}$ ,  $C^5$ -diradical in the main text.

Fig. S10 shows the calculated result of EDA-EDA  $N^{\text{diazo}}$ ,  $C^6$ -diradical, which is unstable and easy to release the  $N_2$  and generate a closed-shell structure. Fig. S11 is CA calculated by DFT and the total energy is -422.4738922 a.u.

The binding energy of  $N^{\text{diazo}}$ ,  $C^5$ -diradical relative to that of the sum of  $N^{\text{diazo}}$ ,  $C^3$ -diradical and CA is:

$$-837.90391759 - (-422.4738922 - 415.38942340) * 627.51 \text{ kcal/mol} = -25.48 \text{ kcal/mol} .$$

The binding energy of  $N^{\text{diazo}}$ ,  $C^8$ -diradical relative to that of the sum of  $N^{\text{diazo}}$ ,  $C^5$ -diradical and  $N^{\text{diazo}}$ ,  $C^3$ -diradical is:

$$-1253.36671276 - (-837.90391759 - 415.38942340) * 627.51 \text{ kcal/mol} = -46.04 \text{ kcal/mol} .$$

**Table S1.** Population of atoms of **EDA N<sup>diazo</sup>, C<sup>3</sup>-diradical**.

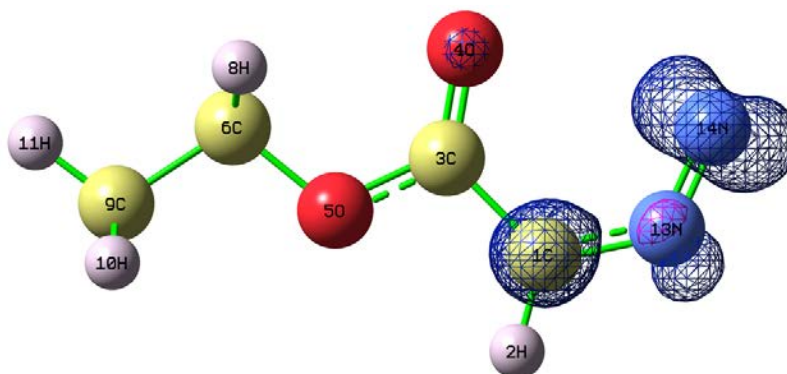

|    | Atom | Atomic charge | Spin_pop. |
|----|------|---------------|-----------|
| 1  | C    | 0.081858      | 0.890425  |
| 2  | H    | 0.082476      | -0.040214 |
| 3  | C    | 0.246185      | -0.078617 |
| 4  | O    | -0.223099     | 0.108744  |
| 5  | O    | -0.364215     | 0.021489  |
| 6  | C    | 0.109590      | 0.000343  |
| 7  | H    | 0.058392      | 0.001300  |
| 8  | H    | 0.058411      | 0.001295  |
| 9  | C    | -0.084782     | 0.000004  |
| 10 | H    | 0.058970      | 0.000066  |
| 11 | H    | 0.055581      | 0.000088  |
| 12 | H    | 0.058963      | 0.000066  |
| 13 | N    | -0.090739     | -0.057549 |
| 14 | N    | -0.047591     | 1.152561  |

Total energy: -415.38942340 a.u.

**Table S2.** Population of atoms of EDA-CA N<sup>diazo</sup>, C<sup>5</sup>-diradical 1.

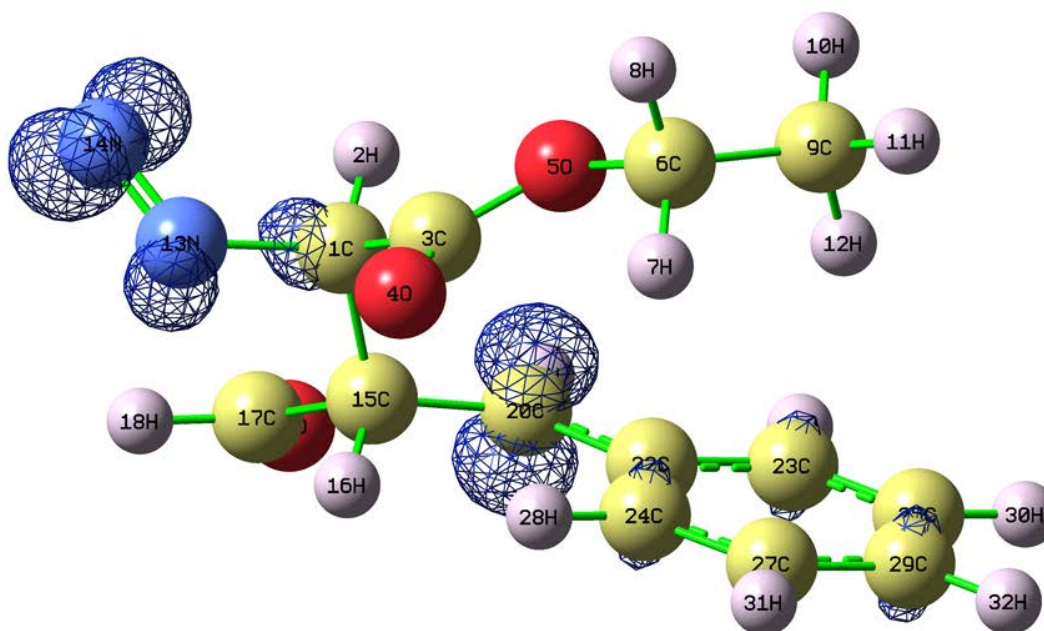

|    | Atom | Atomic charge | Spin_pop. |
|----|------|---------------|-----------|
| 1  | C    | 0.049285      | 0.183519  |
| 2  | H    | 0.072562      | 0.004693  |
| 3  | C    | 0.251802      | -0.008825 |
| 4  | O    | -0.231363     | 0.005274  |
| 5  | O    | -0.336847     | 0.001128  |
| 6  | C    | 0.114620      | 0.000233  |
| 7  | H    | 0.058088      | 0.000446  |
| 8  | H    | 0.058543      | 0.000509  |
| 9  | C    | -0.070908     | 0.001418  |
| 10 | H    | 0.055959      | -0.000046 |
| 11 | H    | 0.050833      | -0.000071 |
| 12 | H    | 0.055343      | -0.000707 |
| 13 | N    | -0.083927     | 0.115345  |

---

|    |   |           |           |
|----|---|-----------|-----------|
| 14 | N | -0.081044 | 0.740526  |
| 15 | C | -0.155210 | -0.087778 |
| 16 | H | 0.086702  | 0.011413  |
| 17 | C | 0.192059  | 0.015480  |
| 18 | H | 0.052709  | 0.000367  |
| 19 | O | -0.193237 | -0.003074 |
| 20 | C | -0.024745 | 0.859985  |
| 21 | H | 0.046210  | -0.039289 |
| 22 | C | 0.052587  | -0.220464 |
| 23 | C | -0.036243 | 0.203693  |
| 24 | C | -0.06394  | 0.225360  |
| 25 | C | -0.017284 | -0.105403 |
| 26 | H | 0.019665  | -0.008893 |
| 27 | C | -0.016270 | -0.110173 |
| 28 | H | 0.030354  | -0.010308 |
| 29 | C | -0.016872 | 0.229707  |
| 30 | H | 0.026513  | 0.003335  |
| 31 | H | 0.027336  | 0.003411  |
| 32 | H | 0.026723  | -0.010813 |

---

Total energy: -837.90391759 a.u.



**Table S3.** Population of atoms of EDA-CA N<sup>diazo</sup>, C<sup>5</sup>-diradical 2.

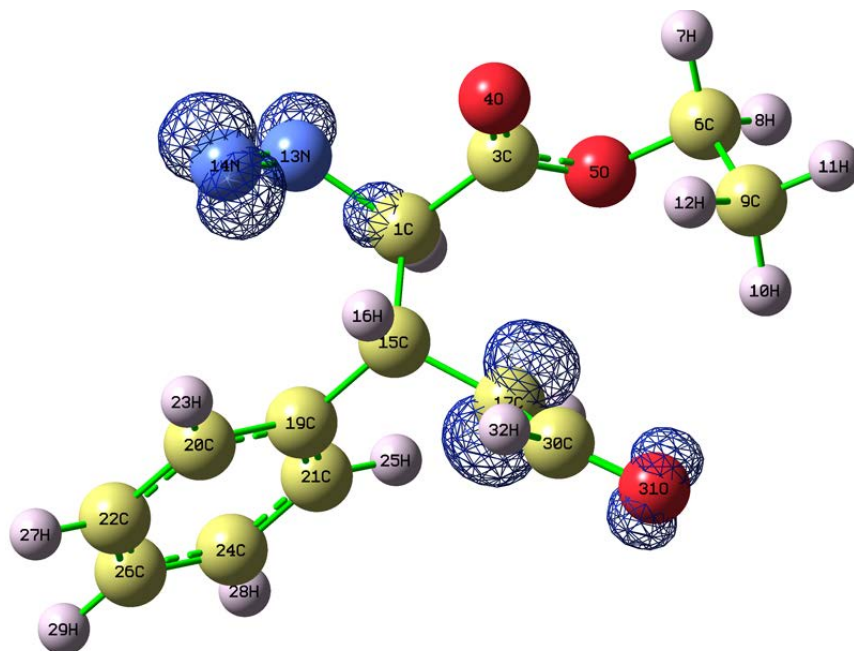

|    | Atom | Atomic charge | Spin_pop. |
|----|------|---------------|-----------|
| 1  | C    | 0.083259      | 0.159859  |
| 2  | H    | 0.070036      | -0.008451 |
| 3  | C    | 0.244528      | 0.002556  |
| 4  | O    | -0.223491     | -0.003768 |
| 5  | O    | -0.34728      | 0.004563  |
| 6  | C    | 0.124532      | -0.000212 |
| 7  | H    | 0.064885      | 0.000017  |
| 8  | H    | 0.057473      | 0.000085  |
| 9  | C    | -0.129893     | 0.001441  |
| 10 | H    | 0.072272      | -0.001207 |
| 11 | H    | 0.061027      | -0.000226 |
| 12 | H    | 0.070631      | 0.000861  |
| 13 | N    | -0.080281     | 0.125326  |
| 14 | N    | -0.080038     | 0.723458  |
| 15 | C    | -0.103863     | -0.065189 |

---

|    |   |           |           |
|----|---|-----------|-----------|
| 16 | H | 0.051845  | 0.004411  |
| 17 | C | 0.004043  | 0.904715  |
| 18 | H | 0.067488  | -0.044349 |
| 19 | C | 0.01751   | 0.021073  |
| 20 | C | -0.005769 | 0.006552  |
| 21 | C | -0.039709 | 0.006856  |
| 22 | C | -0.015977 | -0.000241 |
| 23 | H | 0.024537  | 0.000754  |
| 24 | C | -0.013127 | -0.002159 |
| 25 | H | 0.015519  | 0.000501  |
| 26 | C | -0.009639 | 0.008715  |
| 27 | H | 0.028928  | 0.000266  |
| 28 | H | 0.026387  | 0.000173  |
| 29 | H | 0.028958  | -0.000421 |
| 30 | C | 0.152835  | -0.159185 |
| 31 | O | -0.242369 | 0.312752  |
| 32 | H | 0.024745  | 0.000474  |

---

Total energy: -837.90059171 a.u.

**Table S4.** Population of atoms of EDA-EDA-CA N<sup>diazo</sup>, C<sup>8</sup>-diradical.

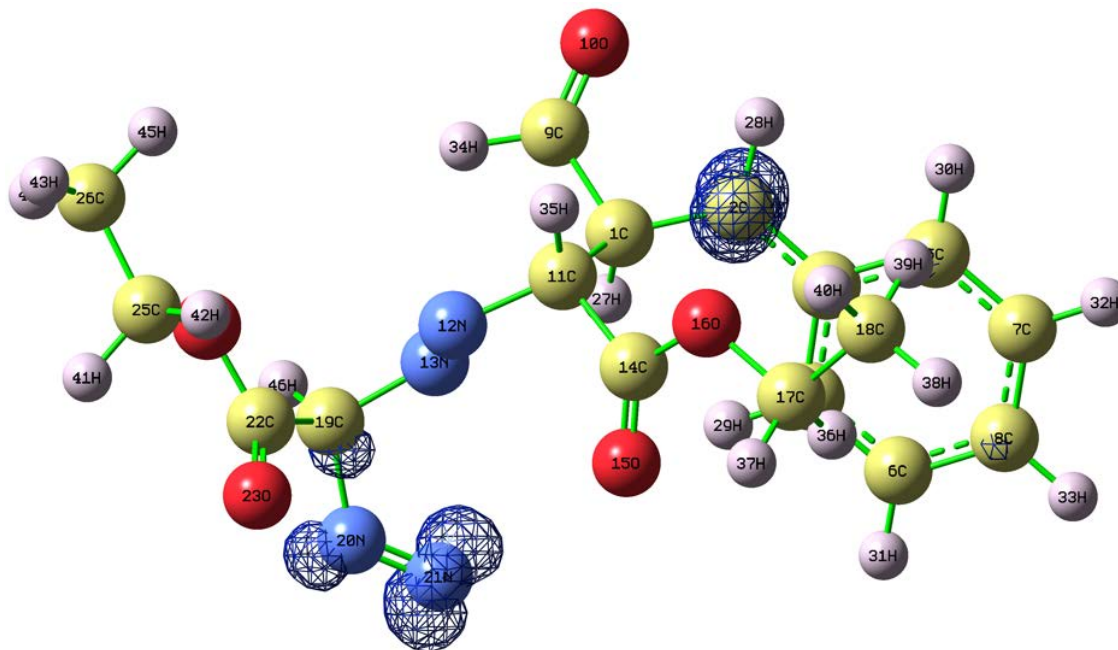

|    | Atom | Atomic charge | Spin_pop. |
|----|------|---------------|-----------|
| 1  | C    | -0.146085     | -0.085275 |
| 2  | C    | -0.005553     | 0.869410  |
| 3  | C    | 0.023609      | -0.216341 |
| 4  | C    | -0.037863     | 0.214528  |
| 5  | C    | -0.039378     | 0.199946  |
| 6  | C    | -0.012420     | -0.104896 |
| 7  | C    | -0.018244     | -0.103581 |
| 8  | C    | -0.019954     | 0.218683  |
| 9  | C    | 0.197336      | 0.012757  |
| 10 | O    | -0.198508     | -0.003040 |
| 11 | C    | 0.056107      | 0.048185  |
| 12 | N    | -0.12564      | 0.023259  |
| 13 | N    | -0.145807     | -0.003326 |
| 14 | C    | 0.237363      | -0.005588 |
| 15 | O    | -0.218017     | 0.005137  |
| 16 | O    | -0.339173     | 0.001059  |

---

|    |   |           |           |
|----|---|-----------|-----------|
| 17 | C | 0.116648  | 0.001411  |
| 18 | C | -0.071799 | 0.002067  |
| 19 | C | 0.195602  | 0.160142  |
| 20 | N | -0.091142 | 0.101537  |
| 21 | N | -0.065563 | 0.737811  |
| 22 | C | 0.242041  | -0.005974 |
| 23 | O | -0.215738 | -0.001015 |
| 24 | O | -0.358724 | 0.000676  |
| 25 | C | 0.114437  | 0.000546  |
| 26 | C | -0.085588 | 0.000000  |
| 27 | H | 0.101484  | 0.009659  |
| 28 | H | 0.037958  | -0.040496 |
| 29 | H | 0.025749  | -0.010981 |
| 30 | H | 0.016690  | -0.008960 |
| 31 | H | 0.028476  | 0.003270  |
| 32 | H | 0.022476  | 0.003247  |
| 33 | H | 0.024291  | -0.010277 |
| 34 | H | 0.024181  | 0.000015  |
| 35 | H | 0.068931  | -0.001836 |
| 36 | H | 0.060306  | -0.001325 |
| 37 | H | 0.058467  | 0.000577  |
| 38 | H | 0.052351  | -0.000015 |
| 39 | H | 0.051510  | -0.001705 |
| 40 | H | 0.055333  | 0.000035  |
| 41 | H | 0.059190  | 0.000039  |
| 42 | H | 0.057955  | -0.000023 |
| 43 | H | 0.055298  | 0.000028  |
| 44 | H | 0.058581  | 0.000001  |
| 45 | H | 0.057461  | 0.000002  |
| 46 | H | 0.095365  | -0.009371 |

---

Total energy: -1253.36671276 a.u.

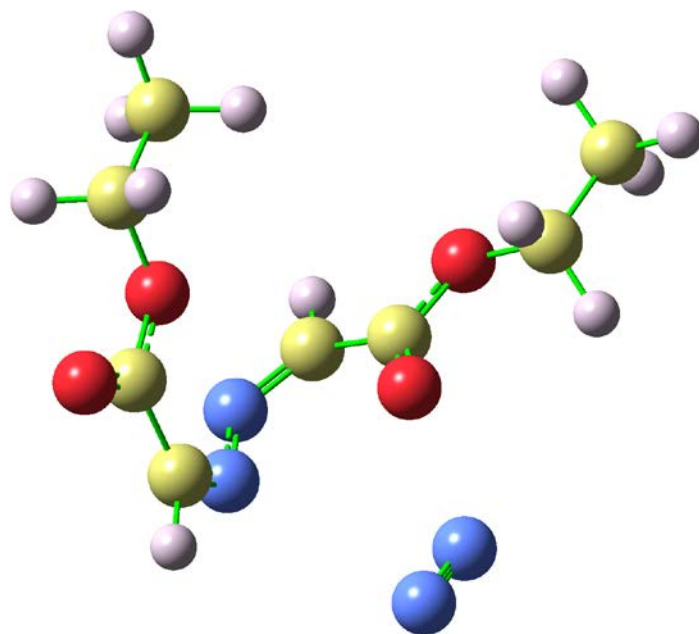

**Fig. S10.** EDA-EDA  $N^{\text{diazo}}$ ,  $C^6$ -diradical calculated by DFT.

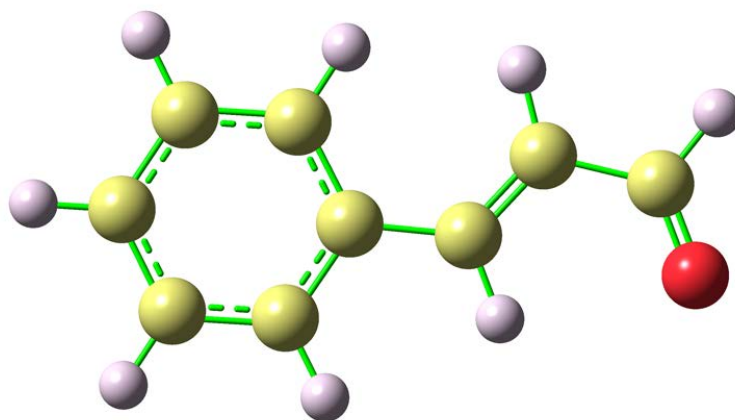

**Fig. S11.** CA calculated by DFT. Total energy: -422.4738922 a.u.

## 2.8 DFT calculations for Step 1

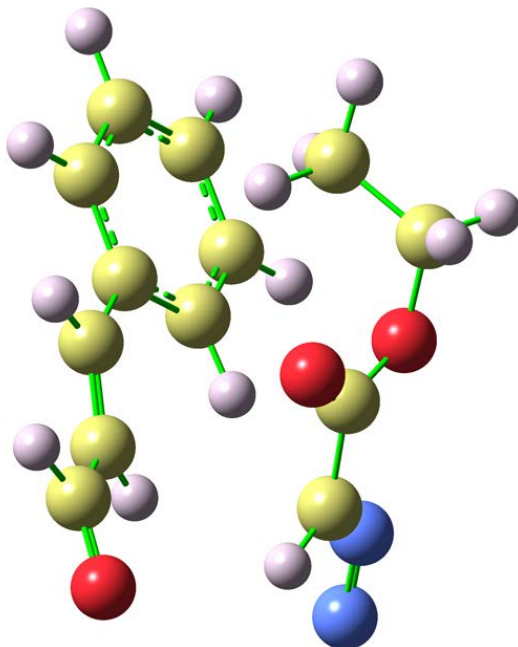

**Fig. S12.** The computed reactants (EDA and CA) in Step 1.

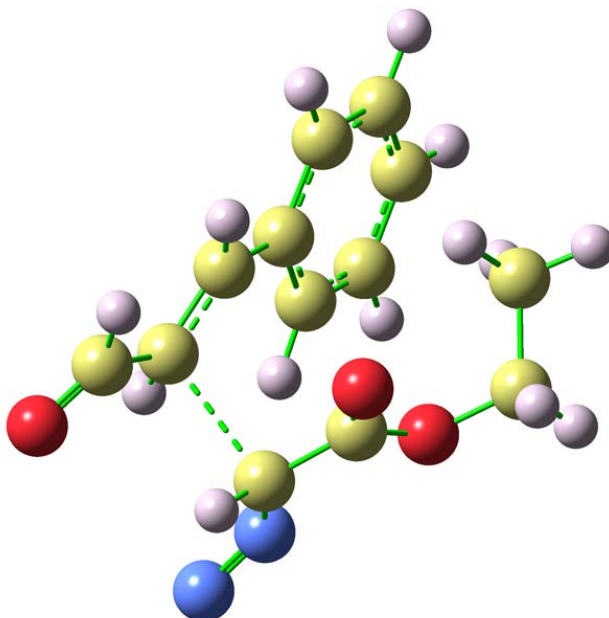

**Fig. S13.** The computed transition state TS1 in Step 1.

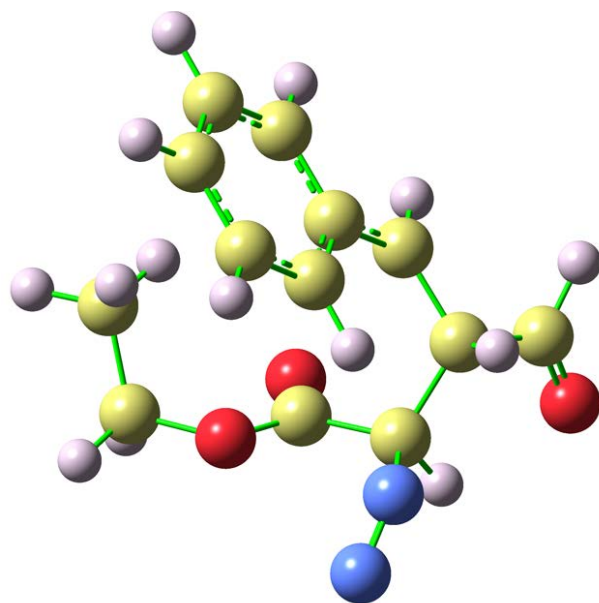

**Fig. S14.** The computed product in Step 1.

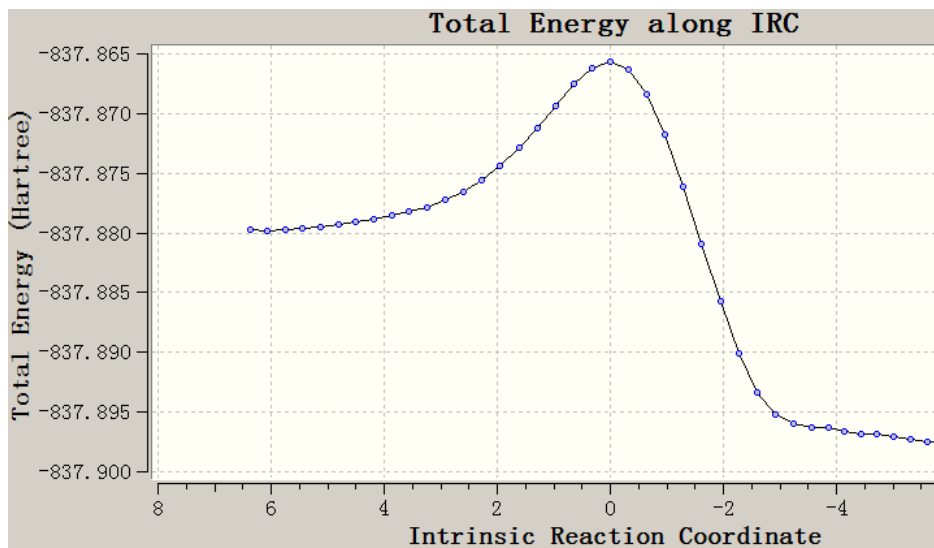

**Fig. S15.** The total energy along intrinsic reaction coordinate (IRC).

The structures and IRC are optimized by M06-2X/def2-SVP. To get more accurate transformation of the energy, M06-2X/def2-TZVP is used. The data are shown below.

Reactants: -838.8335443 a.u.

**TS1:** -838.8179971 a.u.

Product: -838.8518032 a.u.

The energy transformation of Step 1= $627.51*(-838.8518032+838.8335443)= -11.46$  kcal/mol.

The barrier= $627.51*(-838.8179971+838.8335443)= +9.76$  kcal/mol.



### 3. Supplementary Reference:

1. K. Maruoka, M. Oishi and H. Yamamoto, *Macromolecules*, 1996, **29**, 3328-3329.
2. H. Lu, W. I. Dzik, X. Xu, L. Wojtas, B. de Bruin and X. P. Zhang, *J. Am. Chem. Soc.*, 2011, **133**, 8518-8521.
